# Supplementary material for: Gain-of-function p53 protein transferred via small extracellular vesicles promotes conversion of fibroblasts to a cancer-associated phenotype
Source: PubMed Central journal article supplement — Cell Rep. Author manuscript; Available in PMC 2021 Mar 15. (PMC7957825; doi:10.1016/j.celrep.2021.108726), 2021-02-09
Supplement: NIHMS1672401-supplement-5.pdf [file NIHMS1672401-supplement-5.pdf]

Figure 1C

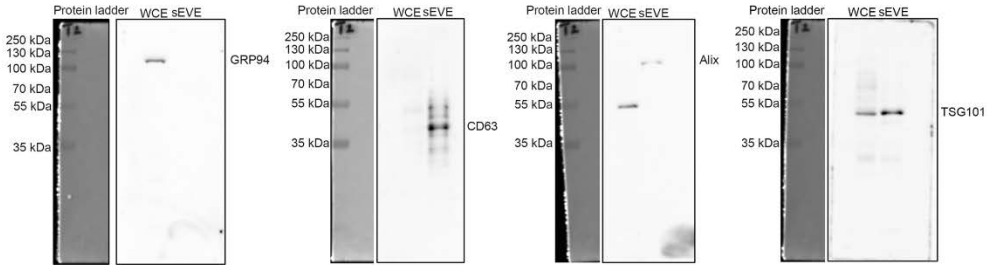

Figure 1D

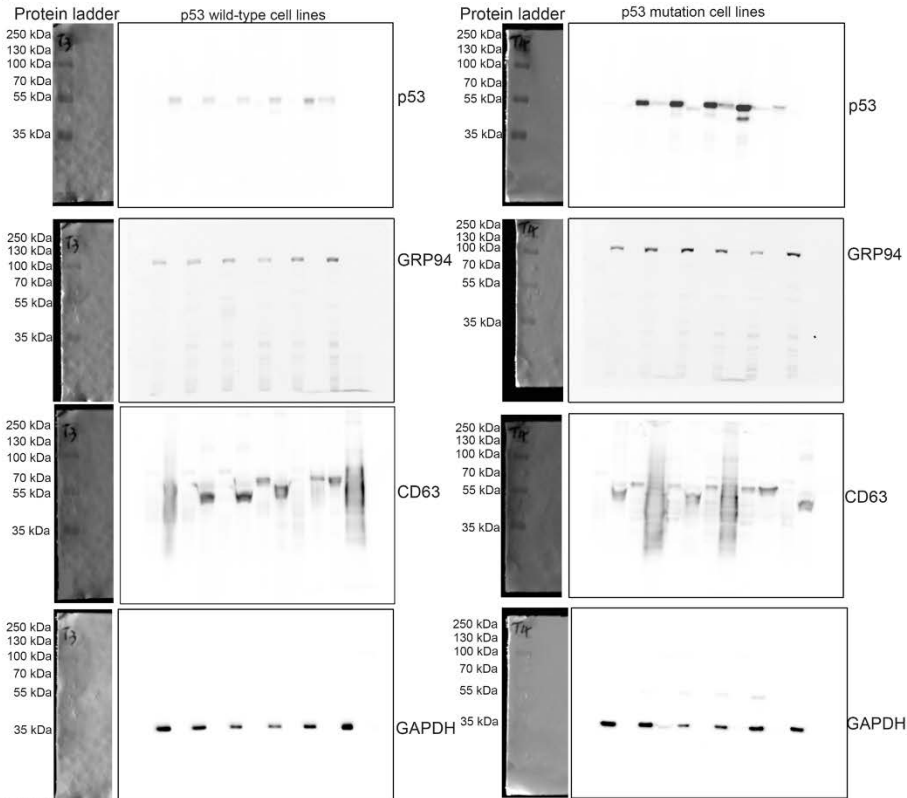

Figure 1E

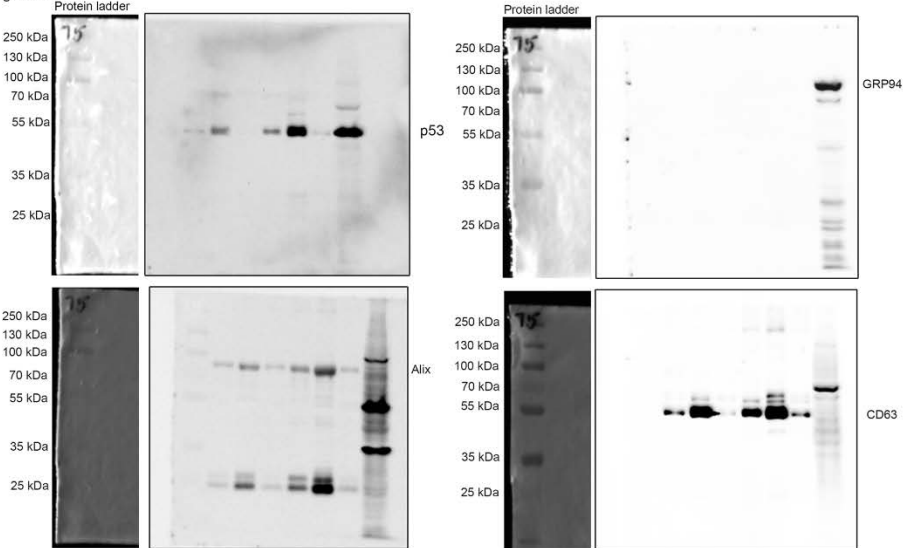

Uncropped western blotting, Related to Figure 1

Figure 2A

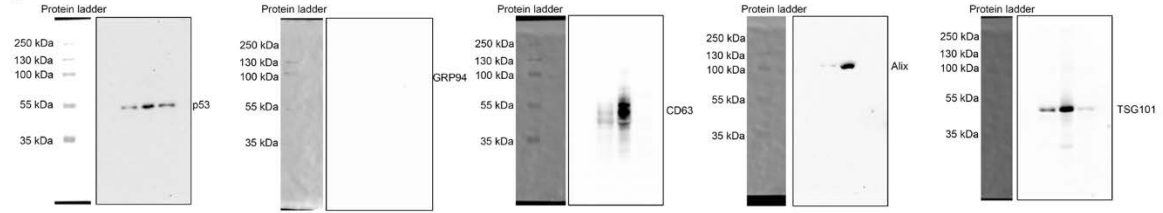

Figure 2B

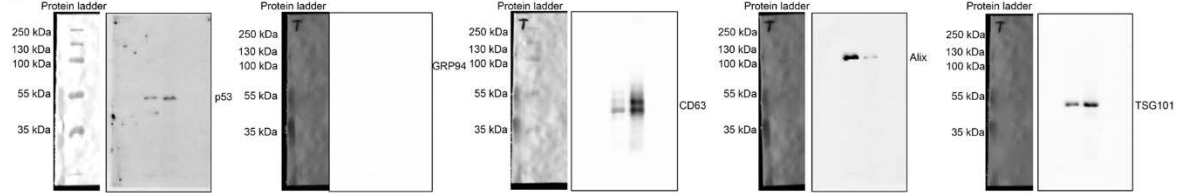

Figure 2D

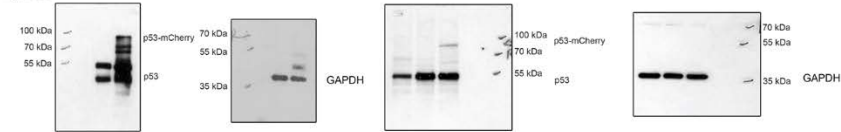

Figure 2E

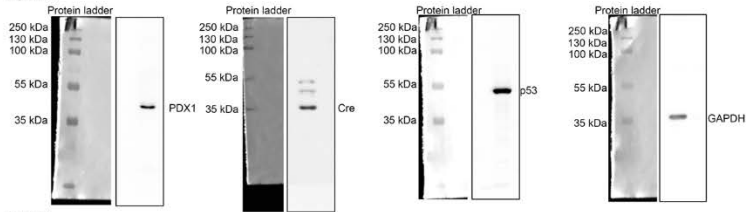

Figure 2F

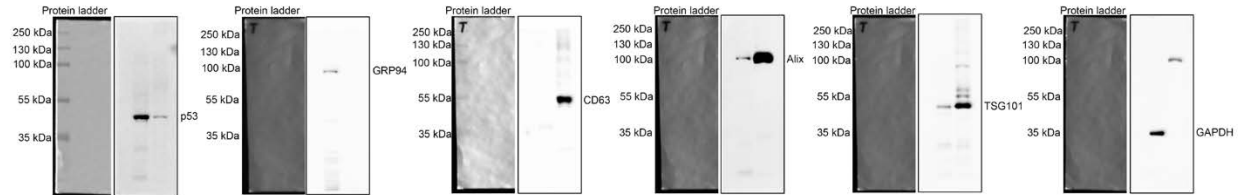

## Uncropped western blotting, Related to Figure 2

Figure 3B

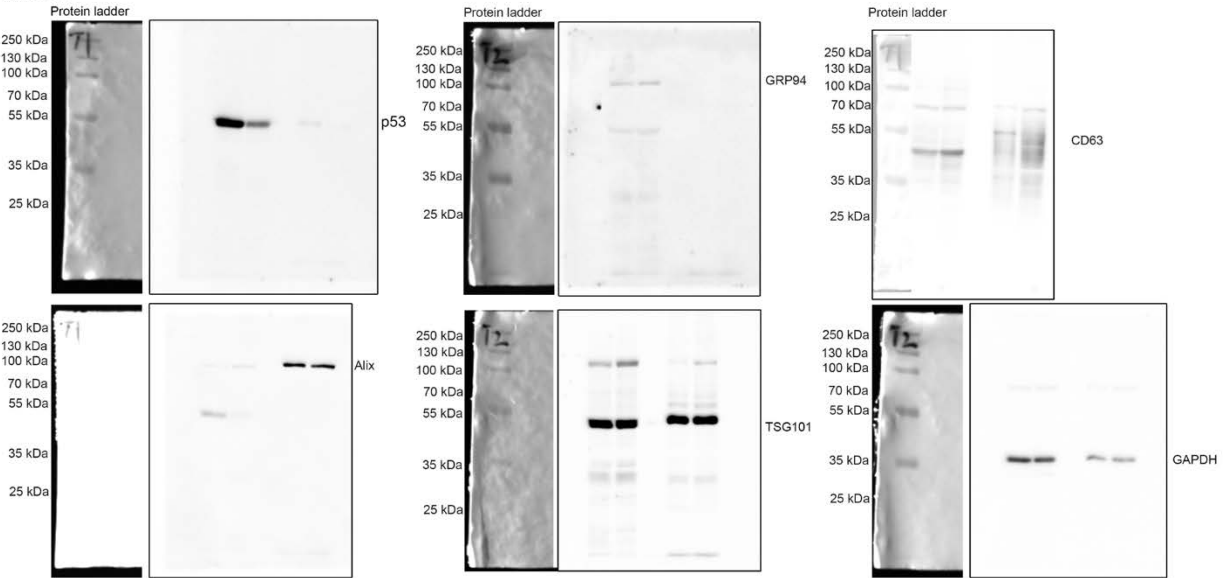

Uncropped western blotting, Related to Figure 3

Figure 4A

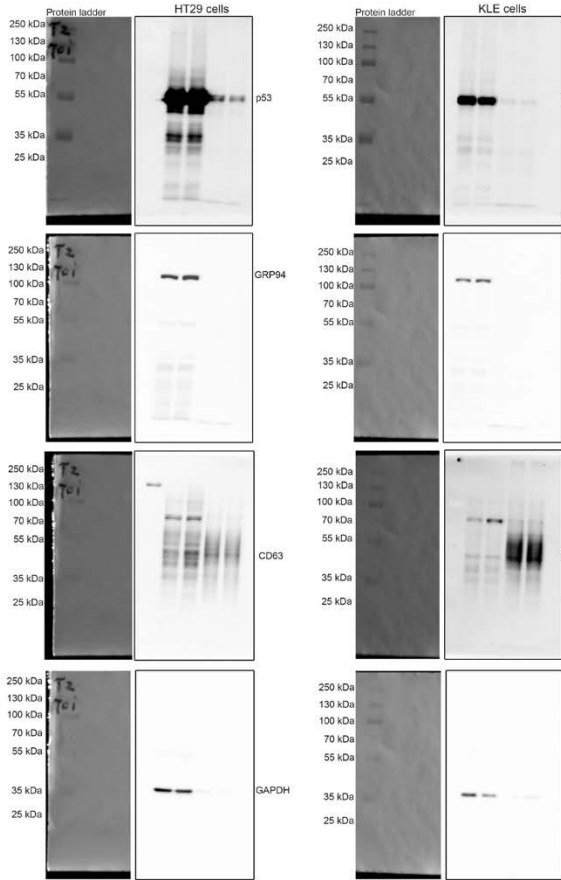

Figure 4B

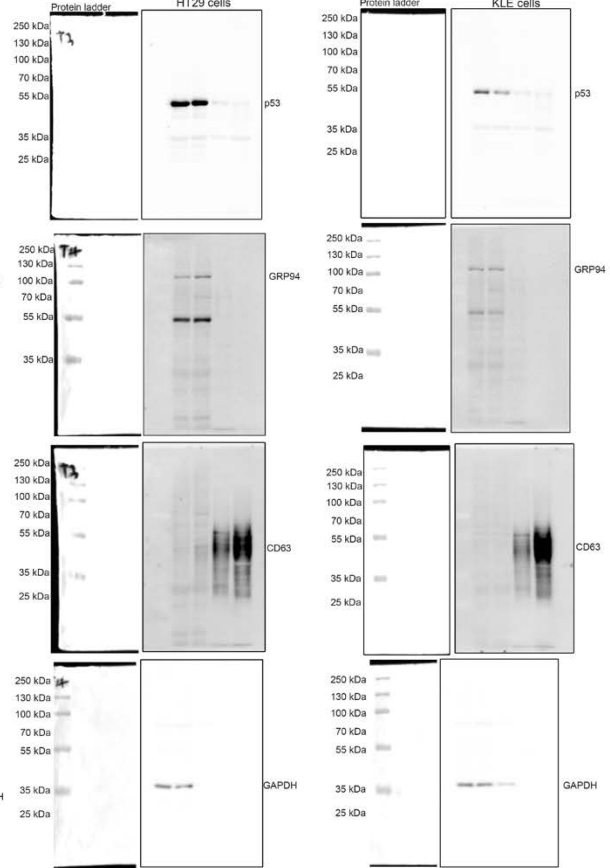

Uncropped western blotting, Related to Figure 4A and Figure 4B

Figure 4C

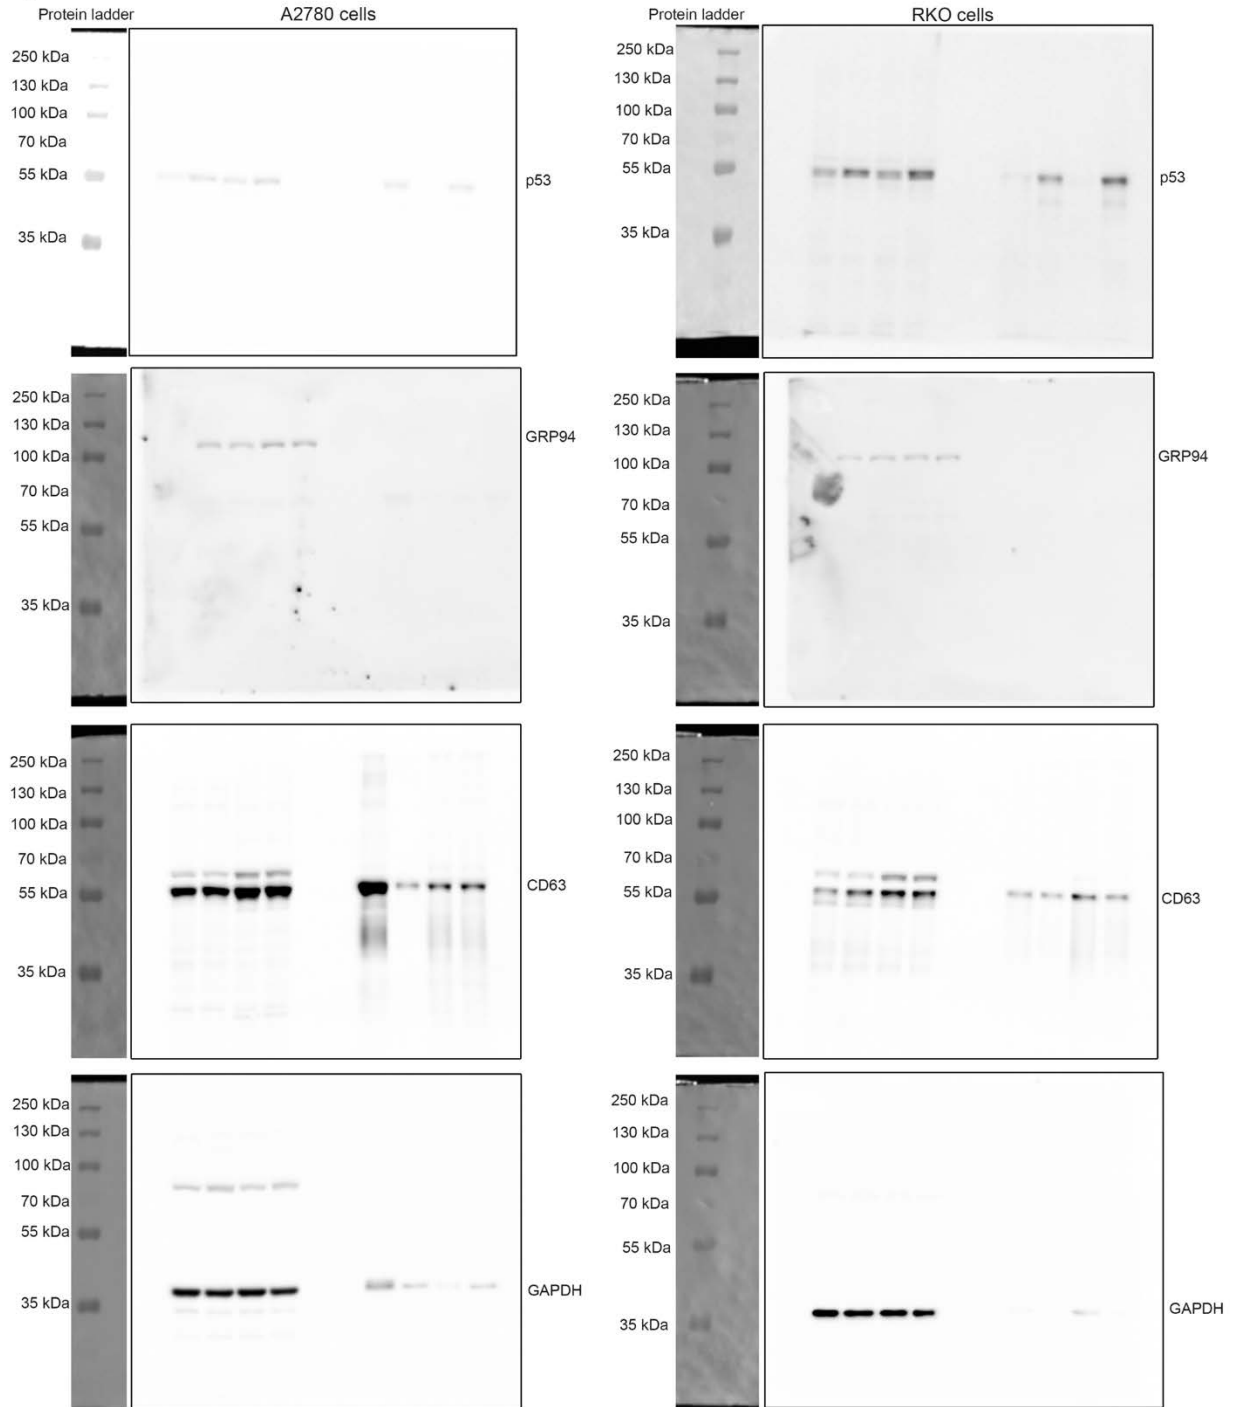

Uncropped western blotting, Related to Figure 4C

Figure 4D

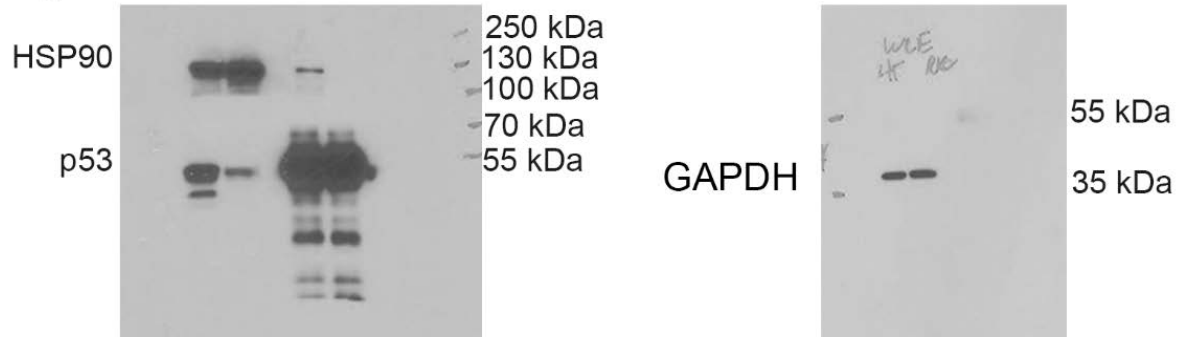

Uncropped western blotting, Related to Figure 4D

Figure S1C

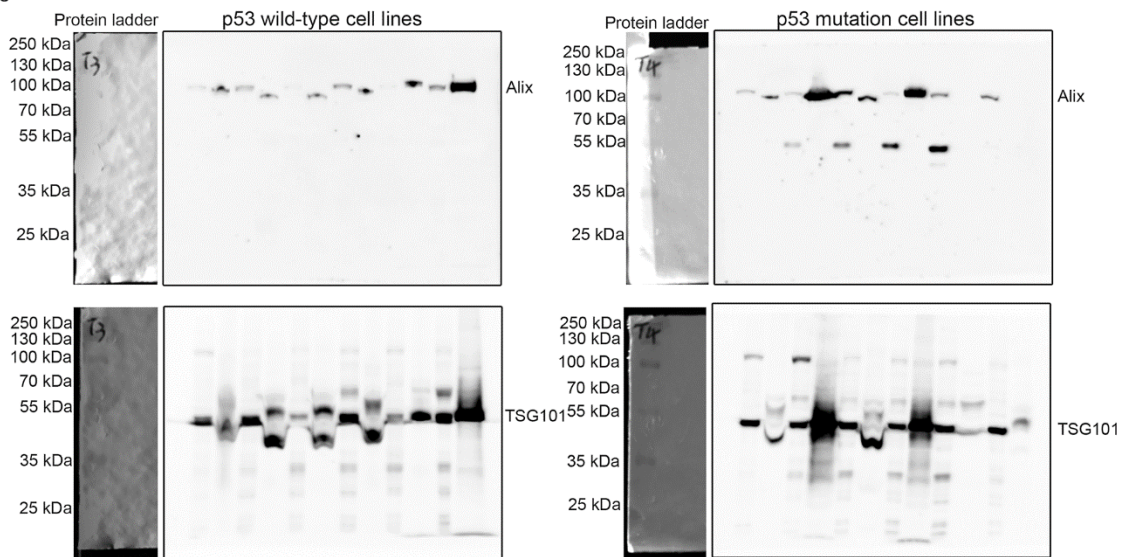

Figure S1E

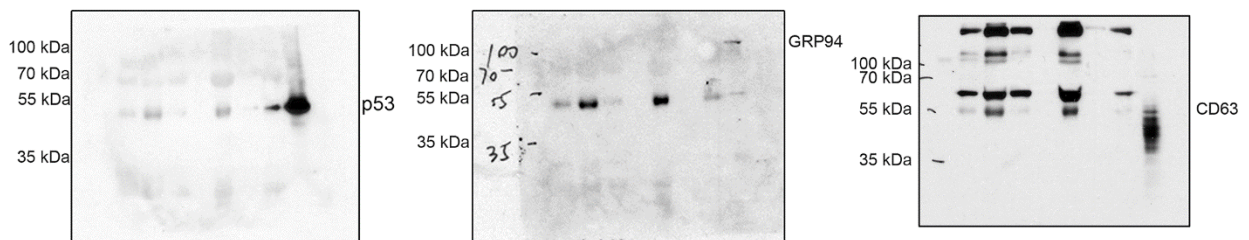

Uncropped western blotting, Related to Figure S1

Figure S2C

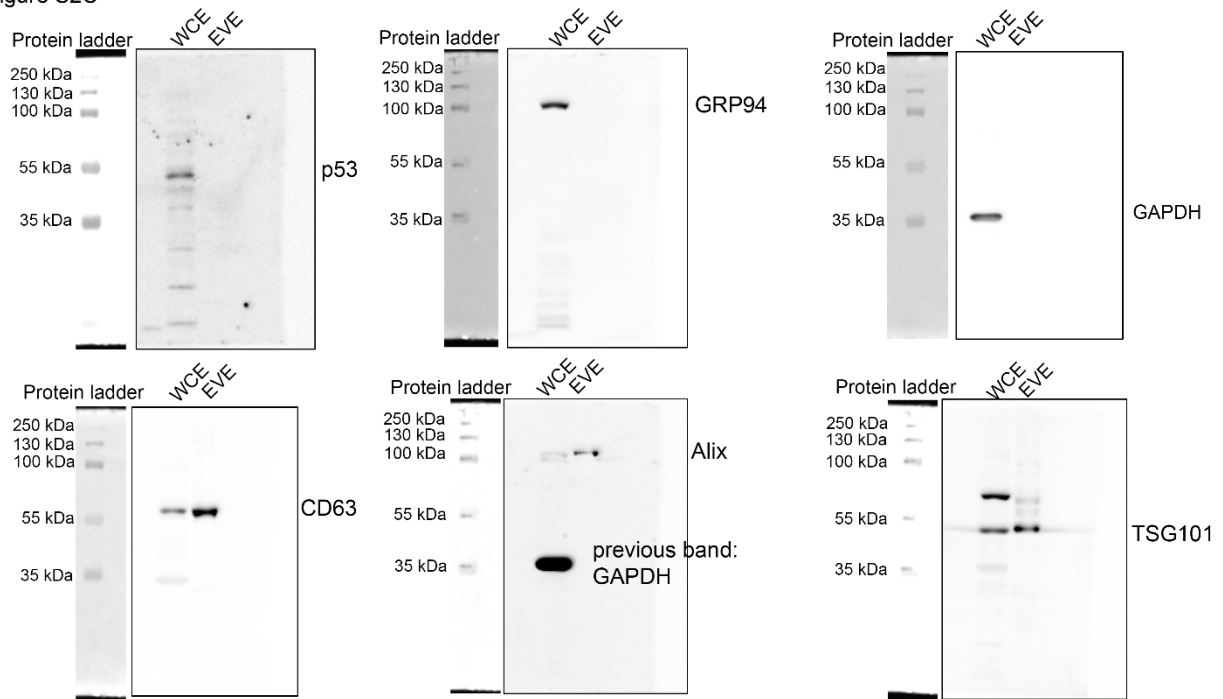

Uncropped western blotting, Related to Figure S2

Figure S4A

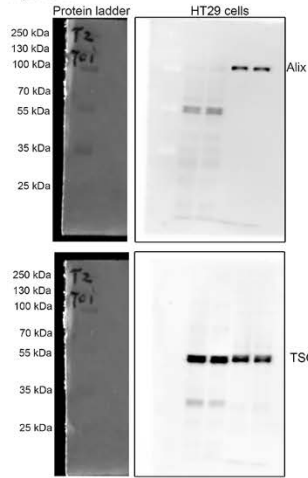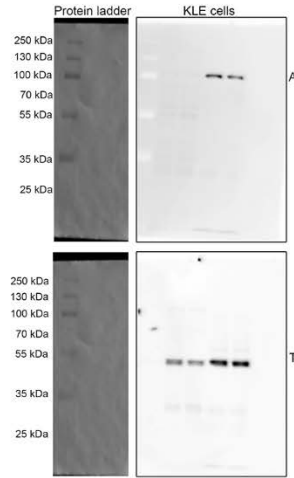

Figure S4B

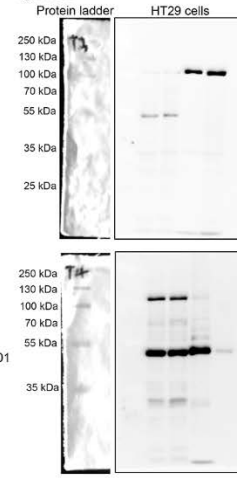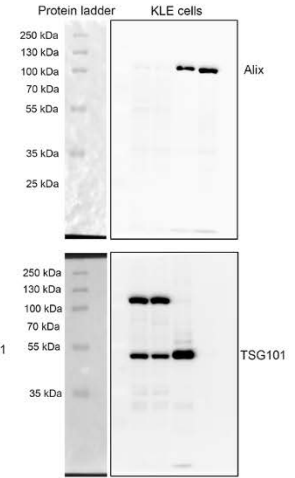

Figure S4C

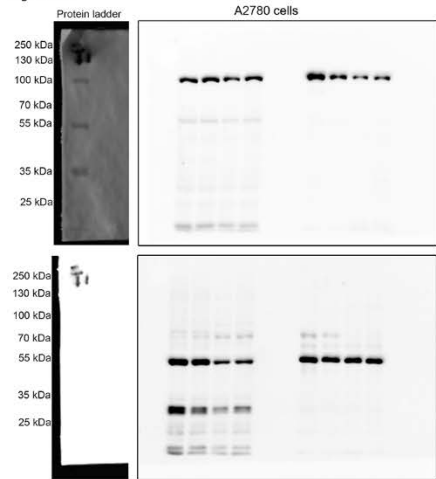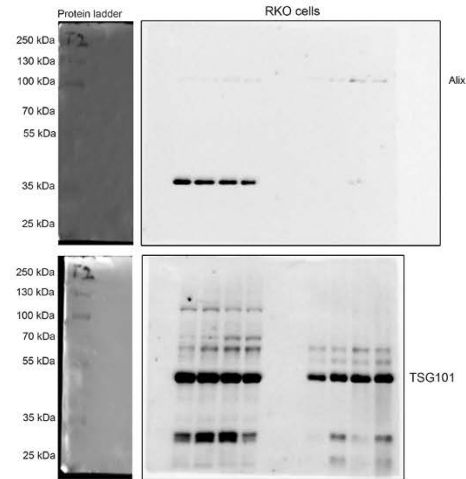

Uncropped western blotting, Related to Figure S4
